# Supplementary material
Source: PubMed Central journal article supplement (PMC1868951)
Supplement: pgen.0030074.sd001.pdf [file pgen.0030074.sd001.pdf]

# Protocol S1: Derivation of the test statistic

V. Plagnol, J. D. Cooper, J. A. Todd and D. G. Clayton

## Model description

The disease status  $Y$  (the outcome variable in our model) is a vector of binary variables. The vector  $X$  of explanatory variables (the genotypes) can take three values (1, 2, 3). We assume a logistic model:  $\text{logit} [\mathbb{P}(Y_i = 1)] = \alpha + \beta X_i$ . We denote the set of fluorescent intensities by  $Z$ .

$\gamma = (\alpha, \beta)$  describe the relation between genotype  $X$  and disease status  $Y$ . A second set of parameter  $\theta$  describes the location of the fluorescent signal clouds. A third set  $\phi$  describe the allelic frequencies for the genotype  $X$  in this case-control study. The full likelihood can be written as:

$$\mathbb{P}(X, Y, Z | \gamma, \phi, \theta) = \mathbb{P}(X | \phi) \mathbb{P}(Y | X, \gamma) \mathbb{P}(Z | X, Y, \theta)$$

Here,  $X$  is a missing data. We note that the dependence of the distribution  $\mathbb{P}(Z | X, Y, \theta)$  on  $Y$  results from the differential bias (the disease status affects the fluorescent signal).

## Non-stratified score test

The score statistic is the derivative of the log-likelihood with respect to  $\beta$  taken at  $\beta = 0$ . Therefore, the contribution of a single individual to the score is:

$$\begin{aligned} \frac{\partial \log L(\beta | Z, Y)}{\partial \beta} &= \frac{\partial}{\partial \beta} (\log \mathbb{P}(Y, Z | \alpha, \beta, \phi, \theta)) \\ &= \frac{\partial}{\partial \beta} \left( \log \sum_{X=1}^3 \mathbb{P}(Z | X = i, Y) \mathbb{P}(Y | X = i; \alpha, \beta) \mathbb{P}(X = i) \right) \\ &= \frac{\sum \mathbb{P}(X = i) \mathbb{P}(Z | X = i, Y) \frac{\partial}{\partial \beta} \mathbb{P}(Y | X = i; \alpha, \beta)}{\sum \mathbb{P}(Z | X = i, Y) \mathbb{P}(Y | X = i; \alpha, \beta) \mathbb{P}(X = i)} \\ &= \frac{\sum \mathbb{P}(X = i) \mathbb{P}(Z | X = i, Y) \mathbb{P}(Y | X = i; \alpha, \beta) \frac{\partial}{\partial \beta} (\log \mathbb{P}(Y | X = i; \alpha, \beta))}{\sum \mathbb{P}(Z | X = i, Y) \mathbb{P}(Y | X = i; \alpha, \beta) \mathbb{P}(X = i)} \\ &= \frac{\sum \mathbb{P}(X = i) \mathbb{P}(Y, Z | X = i; \alpha, \beta) \frac{\partial}{\partial \beta} (\log \mathbb{P}(Y | X = i; \alpha, \beta))}{\mathbb{P}(Y, Z | \alpha, \beta)} \\ &= \mathbb{E}_{(X|Y,Z)} \left[ \frac{\partial \log \mathbb{P}(Y | X = i; \alpha, \beta)}{\partial \beta} \right] \end{aligned}$$

We have [1, Chap. 4]:

$$\frac{\partial \log \mathbb{P}(Y | X; \alpha, \beta)}{\partial \beta} = (Y - \pi_X) X$$

where  $\pi_X = \mathbb{E}(Y|X; \alpha, \beta)$ . Therefore:

$$\mathbb{E}_{(X|Y,Z)} \left[ \frac{\partial \log \mathbb{P}(Y|X; \beta)}{\partial \beta} \right] = (Y - \pi_X) \mathbb{E}(X|Y, Z)$$

Replacing  $\alpha$  by its MLE at  $\beta = 0$  we have  $\pi_X = \bar{Y}$  (independent of  $X$ ) and one obtains the score statistic  $U$  by summing over all individuals:

$$U = \sum_i (Y_i - \bar{Y}) \mathbb{E}(X_i | Z_i, Y_i)$$

## Stratified score test

In the stratified version we define a geographic indicator variable  $S_i \in \{1, \dots, S\}$  and:

$$\text{logit} [\mathbb{P}(Y_i = 1)] = \alpha + \beta X_i + \sum_s \gamma_s 1_{S_i=s}$$

As in the non-stratified case the contribution of one individual to the likelihood is:

$$\begin{aligned} \frac{\partial \log L(\beta | Y_i, Z_i, S_i)}{\partial \beta} &= \mathbb{E}_{(X_i | Y_i, Z_i, S_i)} \left[ \frac{\partial \log \mathbb{P}(Y_i | X_i; \alpha, \beta, \gamma)}{\partial \beta} \right] \\ &= \mathbb{E}_{(X_i | Y_i, Z_i, S_i)} [(Y_i - \pi_i) X_i] \\ &= (Y_i - \pi_i) \mathbb{E}(X_i | Y_i, Z_i, S_i) \end{aligned}$$

where  $\pi_i = \mathbb{E}(Y_i | X_i, S_i; \alpha, \beta)$

Replacing  $\alpha, \gamma$  by MLEs at  $\beta = 0$  we have:  $\pi_i = \bar{Y}_{S_i}$  where  $\bar{Y}_s$  is the average  $Y$  in the strata  $s$ . When summing over all individual we obtain:

$$U = \sum_i (Y_i - \bar{Y}_{S_i}) \mathbb{E}(X_i | Z_i, Y_i, S_i)$$

The presence of the geographic variable  $Z_i$  indicates that the scoring algorithm must account for the geographic stratification. In that test each stratum has a score (computed as in the non-stratified case) and the overall score is the sum over strata. The score variance is also computed separately for each stratum (as in the non-stratified case) and then summed over strata. As in the non-stratified case the test statistic  $U^2/V$  is distributed as chi-square with one degree of freedom under the null.

## Computation of the score variance

### Profile likelihood argument

We derive the score variance using a profile likelihood argument. The score variance is the inverse of the marginal value (in  $\beta$ ) of the inverse of the information matrix. Considering only the logit model, the information matrix is:

$$I(\alpha, \beta) = \begin{pmatrix} \frac{\delta^2 \log L(Y, X | \alpha, \beta)}{\delta \beta^2} & \frac{\delta^2 \log L(Y, X | \alpha, \beta)}{\delta \beta \delta \alpha} \\ \frac{\delta^2 \log L(Y, X | \alpha, \beta)}{\delta \beta \delta \alpha} & \frac{\delta^2 \log L(Y, X | \alpha, \beta)}{\delta \alpha^2} \end{pmatrix} = \pi_{X_i} (1 - \pi_{X_i}) \begin{pmatrix} \sum_i X_i^2 & \sum_i X_i \\ \sum_i X_i & n \end{pmatrix}$$

where  $X_i$  is in our case  $\mathbb{E}(X_i|Y_i, Z_i)$  and  $\pi_X = \mathbb{P}(Y = 1|X)$ . Taking the inverse at the null we have (using  $\beta = 0, \pi_X = \bar{Y}$ ):

$$I^{-1}(\alpha, \beta) = \frac{1}{\bar{Y}(1 - \bar{Y})(n \sum_i X_i^2 - (\sum_i X_i)^2)} \begin{pmatrix} n & -\sum_i X_i \\ -\sum_i X_i & \sum_i X_i^2 \end{pmatrix}$$

So the score variance is:

$$V = \bar{Y}(1 - \bar{Y})(n \bar{X}_i^2 - \bar{X}_i^2) = \frac{DH}{n} s_X^2$$

### Fuzzy profile likelihood argument

We now show how the score variance is modified by the presence of fuzzy calls. The uncertainty on the calls adds a term to the score variance [2]. The problem is the dependence of  $f_j$  in  $\beta$ . If we note  $g_j = L(Z|X, Y)$  we have, for cases:

$$\mathbb{E}(X|Y, Z) = \frac{\pi_j \phi_j g_j}{\sum_k \pi_k \phi_k g_k}$$

Assuming that  $\phi$  and  $g$  remain constant (which is the case if the genotyping parameters  $\gamma = (\theta, \phi)$  are not affected by variations of  $\beta$ ), at the null  $\beta = 0$  we have:

$$\begin{aligned} \frac{\delta \mathbb{E}(X|Y, Z)}{\delta \beta} &= \pi(1 - \pi) \frac{[j^2 g_j \phi_j] [\sum_k \pi_k \phi_k g_k] - j g_j \phi_j [\sum_k k \phi_k g_k]}{[\sum_k \pi_k \phi_k g_k]^2} \\ &= \pi(1 - \pi) \left[ \sum_j j^2 f_j - \left[ \sum_j j f_j \right]^2 \right] \end{aligned}$$

The fuzzy calls add a term in the score variance. Interestingly, it is exactly the variance of  $X$  under the fuzzy posterior distribution. Of course if calls are known with certainty this variance is zero and one obtains the usual test statistic. If we denote this variance by  $s_i$ , the additional score variance is:

$$\pi(1 - \pi)^2 s_i \text{ for cases and } \pi^2(1 - \pi) s_i \text{ for controls}$$

The overall variance becomes:

$$V = \frac{DH}{n} \left[ s_X^2 - \frac{(1 - \bar{Y}) \sum_{\text{cases}} s_i^2 + \bar{Y} \sum_{\text{controls}} s_i^2}{n} \right]$$

## References

- [1] Nelder JA, Mccullagh P (1983) Generalized Linear Models. Chapman and Hall.
- [2] Louis TA (1982) Finding the observed information matrix when using the EM algorithm. Journal of the Royal Statistical Society Series B 44:226–233.
